# Supplementary material for: PAM-free diagnostics with diverse type V CRISPR-Cas systems
Source: bioRxiv or medRxiv preprint supplement (doi:10.1101/2024.05.02.24306194), 2024-05-03
Supplement: Supplementary file [file media-1.pdf]

# **PAM-free diagnostics with diverse type V CRISPR-Cas systems**

Santosh R. Rananaware<sup>1</sup>, Katelyn S. Meister<sup>1</sup>, Grace M. Shoemaker<sup>1</sup>, Emma K. Vesco<sup>1,†</sup>, Luke Samuel W. Sandoval<sup>2</sup>, Jordan G. Lewis<sup>1</sup>, August P. Bodin<sup>1</sup>, Vedant N. Karalkar<sup>4</sup>, Ian H. Lange<sup>1</sup>, Brianna Lauren Maria Pizzano<sup>1</sup>, Minji Chang<sup>1</sup>, M.Reza Ahmadimashhadi<sup>1</sup>, Sarah J. Flannery<sup>1</sup>, Long. T. Nguyen<sup>1</sup>, Gary P. Wang<sup>5,6</sup>, Piyush K. Jain<sup>1,3,7,\*</sup>

<sup>1</sup> Department of Chemical Engineering, University of Florida, Gainesville, Florida, USA

<sup>2</sup> Department of Biology, CLAS, University of Florida, Gainesville, Florida, USA

<sup>3</sup> Department of Molecular Genetics and Microbiology, University of Florida, Gainesville, Florida, USA

<sup>4</sup> Department of Computer Science, University of Florida, Gainesville, Florida, USA

<sup>5</sup> Department of Medicine, Division of Infectious Diseases and Global Medicine, University of Florida, Gainesville, Florida, USA

<sup>6</sup> Medical Service, North Florida/South Georgia Veterans Health System, Gainesville, Florida, USA

<sup>7</sup> UF Health Cancer Center, University of Florida, Gainesville, Florida, USA

<sup>†</sup>Current Affiliation: Department of Human and Molecular Genetics, Baylor College of Medicine, Houston, Texas, USA

---

\*Corresponding author: [jainp@ufl.edu](mailto:jainp@ufl.edu)

## Supplementary Information

**Table 1:** List of protein sequences used in this study:

| Sr. No. | Name     | Sequence                                                                                                                                                                                                                                                                                                                                                                                                                                                                                                                                                                                                                                                                                                                                                                                                                                                                                                                                                                                                                                                                                                                                                                                                                                                                                                                                                                                                                                                            |
|---------|----------|---------------------------------------------------------------------------------------------------------------------------------------------------------------------------------------------------------------------------------------------------------------------------------------------------------------------------------------------------------------------------------------------------------------------------------------------------------------------------------------------------------------------------------------------------------------------------------------------------------------------------------------------------------------------------------------------------------------------------------------------------------------------------------------------------------------------------------------------------------------------------------------------------------------------------------------------------------------------------------------------------------------------------------------------------------------------------------------------------------------------------------------------------------------------------------------------------------------------------------------------------------------------------------------------------------------------------------------------------------------------------------------------------------------------------------------------------------------------|
| 1       | LbCas12a | MSKLEKFTNCYLSKTLRFKAIPVGKTQENIDNKRLLVEDEKRAEDYKGVKKLL<br>DRYYLSFINDVLHSIKLKNLNNYISLFRKKTRTEKENKELENLEINLRKEIAKAFK<br>GNEGYKSLFKKDIIETILPEFLDDKDEIALVNSFNGFTTAFTGFFDNRENMFSEEA<br>KSTSIAFRCINENLTRYISNMDIFEKVD AIFDKHEVQEIKEKILNSDYDVEDFFEGE<br>FFNFVLTQEGIDVYNAIIGGFVTESEGEKIKGLNEYINL YNQKTKQKLPKFKPLYKQ<br>VLSDRESLSFYGEGYTSDEEVLEVFRNTLNKNSEIFSSIKKLEKLFKNFDEYSSAGI<br>FVKNPAISTISKDIFGEWNVIRDKWNAEYDDIHLKKA VVTEKYEDDRRKSFK<br>KIGSFSLEQLQEYADADLSVVEKLEKIIQKVDEIYKVYGSSEKLFADADFVLEKSL<br>KKNDAVVAIMKDLLDSVKSFENYK AFFGEGKETNRDESFGDFVLA YDILLKV<br>DHIYDAIRNYVTQKPYSKDKFKLYFQNPQFMGGWDKDKETDYRATILRYGSKY<br>YLAIMDKKYAKCLQKIDKDDVNGNYEKINYKLLPGPNKMLPKVFFSKKWMAY<br>YNPSEDIQKIYKNGTFKKGDMFNLNDCHKLIDFFKDSISRYPKWSNAYDFNFSET<br>EKYKDIAGFYREVVEEQGYKVSFESASKKEVDKLVEEGKLYMFQIYNKDFSDKSH<br>GTPNLHTMYFKLLFDENNHGQIRLSGGAE LFMRRASLKKEELV VHPANSPIANK<br>NPDNPKKTTTLSYDVYKDKRFSE DQYELHIPIAINKCPKNIFKINTEVRVLLKHDD<br>NPYVIGIDRGERNLLYIVVVDGKGNIVEQYSLNEIINN FNIRIKTDYHSLDDKKE<br>KERFEARQNWTSIENIKELKAGYISQV VHKICELVEKYDAVIALEDLNSGFKNR<br>VKVEKQVYQKFEKMLIDKLN YMVDKKSNPCATGGALKGYQITNKFESFKSMST<br>QNGFIFYIPAWLTSKIDPSTGFVNLLKTKYTSIADSKKFISSFDRIMYVPEEDLFEF<br>ALDYKNFSRTDADYIKKWKLYSYGNRIRIFRNPKNVFDWEEVCLTSAYKELF<br>NKYGINYQQGDIRALLCEQSDKAFYSSFMALMSLMLQMRNSITGR TDVDFLISP<br>VKNSDGIFYDSRNYEAQENAILPKNADANGA YNIARVLWAIGQFKKA EDEKLD<br>KVKIAISNKEWLEYAQT SVKH                                                                                         |
| 2       | AsCas12a | MTQFEGFTNLYQVSKTLRFELIPQGKTLKHIQE QGFIEEDKARNDHYKELKPIIDR<br>IYKTYADQCLQLVQLDWENLSA AIDSYRKEKTEETRNALIEEQATYRNAIHDIYFI<br>GRTDNLDAINKRHA EIYKGLFKAELFNGKVLKQLGTVTTTEHENALLRSFDKF<br>TTYFSGFYENRKNVFAEDISTAIPH RIVQDNFPKFKENCHIFTRLITAVPSLREHF<br>ENVKKAIGIFVSTSIEEVFSFPFY NQLLTQTQIDLYNQLLGGISREAGTEKIKGLNE<br>VLNLAIQKNDETAHIIASLPHRFIPLFKQILSDRNTLSFILEEFKSDEEVIQSFCKYK<br>TLLRNENVLETAEALFNELNSIDL THIFISHKKLETISSALCDHWDTLRNALYERRI<br>SELTGKITKSAKEKVQRSLKHEDINLQEIISAAGKELSEAFKQKTSEILSHAHAL<br>DQPLPTLKKQEEKEILKSQ LDSLLGLYHLLDWFAVDESNEVDPEFSARLTGIKL<br>EMEPSLSFYNKARNYATKKPYSVEKFKLNFQMPTLASGWDVNKEKNNGAILFV<br>KNGLYYL GIMPQKGRYKALSFEPT EKTSEGFDKMYDYDFPDAAKMIPK CSTQL<br>KAVTAHFQTHHTPILLSN NFIEPLEITKEIYDLNNPEKEPKKFQTAYAKKTGDQKG<br>YREALCKWIDFTRDFLSKYTKTTSIDLSSLR PSSQYKDLGEYYAELNPLLYHISFQ<br>RIAEKEIMDAVETGKLYLFQIYNKDFAKGHHGKPNLHTLYWTGLFSPENLAKTSI<br>KLNQQAELFYRPKSRMKRMAHRLGEKMLNKKLKDQKTPIDTLYQELYDYVN<br>HRLSHDLSDEARALLPNVITKEVSHEI IKDRRFTSDKFFFHVPITLNYQAANSPSKF<br>NQRVNAYLKEHPETPIIGIDRGERNLIYITVIDSTGKILEQRSLNTIQQFDYQKKLD<br>NREKERVAAARQAWSVVGTIKDLKQGYLSQVIHEIVDLMIHYQAVVLENLNFVG<br>KSKRTGIAEKAVYQQFEKMLIDKLNCLVLKDYP AEKVGGLNPNYQLTDQFTSFA<br>KMGTQSGFLFYVPAPYTSKIDPLTGFVDPFVWKT IKNHESRKHFLLEGDFLHYDV<br>KTGDFILHFKMNRNLSFQRGLPGFMPAWDIVFEKNETQF DAKGTPFIAGKRIVPV<br>IENHRFTGRYRDLYPANELIALLEEKGIVFRDGSNILPKLLEND DSHAIDTMVALI<br>RSVLQMRNSNAATGEDYINSPVRDLNGVCFDSRFQNP EWPMADANGAYHIAL<br>KGQLLNHLKESKDLKLQNGISNQDWL AYIQELRN |

|   |                  |                                                                                                                                                                                                                                                                                                                                                                                                                                                                                                                                                                                                                                                                                                                                                                                                                                                                                                                                                                                                                                                                                                                                                                                                                                                                                                                                                                                                                                                                                                                                                                                                                                                                                           |
|---|------------------|-------------------------------------------------------------------------------------------------------------------------------------------------------------------------------------------------------------------------------------------------------------------------------------------------------------------------------------------------------------------------------------------------------------------------------------------------------------------------------------------------------------------------------------------------------------------------------------------------------------------------------------------------------------------------------------------------------------------------------------------------------------------------------------------------------------------------------------------------------------------------------------------------------------------------------------------------------------------------------------------------------------------------------------------------------------------------------------------------------------------------------------------------------------------------------------------------------------------------------------------------------------------------------------------------------------------------------------------------------------------------------------------------------------------------------------------------------------------------------------------------------------------------------------------------------------------------------------------------------------------------------------------------------------------------------------------|
| 3 | ErCas12a         | <p>           NNGTNNFQNFQFIGISSLQKTLRNALIPTETTQQFIVKNGIIEKEDLGENRQILKDIM<br/>           DDYYRGFISETLSSIDDIDWTSLEFEMEIQKNGDNKDTLIKEQTEYRKAIHKKFA<br/>           NDDRFKNMFSAKLISDILPEFVIHNNNYSASEKEEKQVIVKLSRFATSFKDYFKN<br/>           RANCFSAADDISSSSCHRIVNDNAEIFFSNALVYRRIVKSLSNDDINKISGDMKDSL<br/>           KEMSLEEIYSYEKYGEFITQEGISFYNDICGKVNFSFMNLYCQKNKENKNLYKLQK<br/>           LHKQILCIADTSYEVYPYKFESDEEVYQSVNGFLDNISSKHIVERLRKIGDNYNGYN<br/>           LDKIYIVSKFYESVSQKTYRDWETINTALEIHYNILPGNGKSKADKVKKAVKN<br/>           DLQKSITEINELVSNYKLCSDDNKAETIHEISHILNNFEAQELKYNPEIHLVESE<br/>           LKASELKNVLDVIMNAFWCSVFMTEELVDKDNFVYAELEEIYDEIYPVISLYNL<br/>           VRNYVTQKPYSTKKIKLNFGIPTLADGWSKSKEYSNNAILMRDNLYYLGFNAK<br/>           NKPDKKIIEGNTSENKGDYKMIYNLLPGPNKMIPKVFSSKTGVETYKPSAYIL<br/>           EGYKQNKHIKSSKDFDITFCHDLIDYFKNCIAIHPEWKNFGFDFSDTSTYEDISGF<br/>           YREVELQGYKIDWTYISEKDIDLLQEKGLYLFQIYNKDFSKKSTGNDNLHTMY<br/>           LKNLFSEENLKDIVLKLNGEAEIFFRKSSIKNPIHKKGSILVNRTYEAEKQDFGN<br/>           IQIVRKNIPENIYQELYKYFNDKSDKELSDEAAKLNKVVGHHEAATNIVKDYRYT<br/>           YDKYFLHMPITINFKANKTGFINDRILQYIAKEKDLHVIGIDRGERNLIYVSVIDTC<br/>           GNIVEQKSFNIVNGYDYQIKLKQREGARQIARKEWKEIGKIKEGYLSLVIHEI<br/>           SKMVIKYNAIIVMEDLSYGFKGRFKVERQVYQKFETMLINKLNYLVFKDISITE<br/>           NGGLLKGYQLTYIPDKLKNVGHQCGCIFYPAAATSKIDPTTGFVNIKFKDLTV<br/>           DAKREFIKKFDISIRYDSEKNLFCFTFDYNNFITQNTVMSKSSWSVYTYGVRIKRR<br/>           FVNGRFSNESDTIDITKMEKTLEMTDINWRDGHDLRQDIIDYEIVQHIFEIFRLT<br/>           VQMRNSLSELEDRDYDRLISPVLNENNIFYDSAKAGDALPKDADANGAYCIALK<br/>           GLYEIKQITENWKEDGKFSRDKLIKSNKDWDFIQNKRYL         </p> |
| 4 | BrCas12b<br>RFND | <p>           MPVRSFKVKLVTRSGDAEHMLQLRRGLWKTHEIVNQGIAYYMNKLALMRQEP<br/>           YAGKSREVVRLLELHSLRAQQKRNNWTGDAGTDDEILNLSRRLYELLVPSAIGE<br/>           KGDAQMLSRKFLSPLVDPNSEGGKGTAKSGRKPRWMKMREEGHPDWEAEREK<br/>           DEAKKAADPTASILNDLEAFGLRPLFPLFTDEQKGIQWLPKQKRQFVRTWDRDM<br/>           FQQALERMLSWEWNRRVAEEYQKLQAQRDELYAKYLADGGAWLEALQSFEK<br/>           QREVELAEESFAAKSEYLITRRQIRGWKQVYEKWSQLPEHAAQEQQFWQVADV<br/>           QTSPLGAFGDPKVYQFLSQPEHHIWRGYPNRLFHYSYDNGVRKKLQRARHDA<br/>           TFTLPDPVEHPLWIRFDARGGNIHDYEISQNGKQYQVTFSRLLWPENETWVERE<br/>           NVTVAIGASQQLKRQIRLDGYADKKQKVRYRDISSGIELTGVLGGAQIQFDRRH<br/>           LRKASNRLADGETGPVYLVNVVDIEPFLAMRNGRLQTPIGQVLQVVTKDWPKV<br/>           TGYKPAELISWIQNSPLAVGTGVNTIEAGMRVMSVDLGQRSAAAVSIFEVMRQK<br/>           PAEQETKLFYPIAVTGLYAVHRRSLLLRLPGEKISDEIEQQRKIRAHARSLVRYQI<br/>           RLLADVRLHTRGTAEQRRAKLDELLATLQTKQELDQKLWQTELEKLFDYIHEP<br/>           AERWQQALVAHRTLEPVIGQAVRHWRKSLRIDRKLGLAGMSMWNIIELEETRK<br/>           LLIAWSKHSRVPGEPNRLDKEETFAPQQLQHIQNVKDDRLKMANLLVMTALG<br/>           YKYDEAEKQWKEAYPACQMILFEDLSRYRFALDRPRRENRLMKWAHRSIPRL<br/>           VYLQGELFGIQGVVYSAYTSRFHAKTGAPGIRCHALKEEDLQPNSYVVKQLIK<br/>           DGFIREDDTGLKPGQIVPWSGGELFVTLADRSGSRLAVIHADINAQNLQKRFW<br/>           QQNTEIFRVPCKVTTSGLIPAYDKMKKLFKGYFAKINQTDTSEVYVWEHSAKM<br/>           KGKTPADPAEEGVFDESLTDEMEELEDSEGEYKTLFRDPSGGFFWSSDRWLPQK<br/>           EFWFWVKRRIEKKLREQLO         </p>                                                                                                                                                                                                      |
| 5 | Cas12i1          | <p>           MSNKEKNASETRKAYTTKMIPRSHDRMKLLGNFMDYLMGDTPIFFELWNQFGG<br/>           GIDRDIISGTANKDKISDDLAVNWFKVMPSKPKQVSPSNLANLFQQYSGSEP<br/>           DIQAQYEFASNFDEKHQWKDMRVEYERLLAELQLSRSDMHHDLKLMYKEKCI<br/>           GLSLSTAHYITSMFMTGAKNNRQTKHQFYKVIQVLEESTQINSVEQLASIILKA<br/>           GDCDSYRKLIRCSRKGATPSILKIVQDYELGTNHDDEVNVPISLIANLKEKLGFR<br/>           EYECEWKCMEKIKAFASKVGPYYLGSYSAMLENALSPIKGMTTKNCKFVLKQI<br/>           DAKNDIKYENEPFGKIVEGFFDSPYFESDTNVKVVLPHPHIGESNIKTLWEDLNA<br/>           IHSKYEEDIASLSEDKKEKRIKVVYQGDVCQTINTYCEEVGEAKTPLVQLLRYLY<br/>           SRKDDIAVDKIIDGITFLSKKHKVEKQKINPVIQKYPFNFNGNSKLLGKIISPKDK<br/>           LKHNLKCNRNQVDNYIWIIEIKVLNKTMRWEKHHYALSSTRFLEEYVYPATSEN<br/>           PPDALAARFRKTNNGYEGKPAESAEQIEQIRSAVGLRKVKKRQMRLEAARQQN<br/>           LLPRYTGWKDFNINICKRGNNEFVTLATKVKKKKEKKNYKVVLYGDANIVRKNT<br/>           YAAIEAHANGDGVIDYNDLPVKPIESGFVTVESQVRDKSYDQLSYNGVKLLYCK         </p>                                                                                                                                                                                                                                                                                                                                                                                                                                                                                                                                                                                                                                                                                                                                   |

|  |  |                                                                                                                                                                                                                                                                                                                                                                                                                          |
|--|--|--------------------------------------------------------------------------------------------------------------------------------------------------------------------------------------------------------------------------------------------------------------------------------------------------------------------------------------------------------------------------------------------------------------------------|
|  |  | PHVESRRSFLEKYRNGTMKDNRGNNIQIDFMKDFEAIADDETSLYYFNMKYCKL<br>LQSSIRNHSSQAKEYREEIFELLRDGKLSVLKLSLNLVFMFKVAKSLIGTYFG<br>HLLKKPKNSKSDVKAPPITDEDKQKADPEMFALRLALEEKRLNKVKSKEVIAN<br>KIVAKALELRDKYGPVLIKGENISDTTKKGKKSSTNSFLMDWLARGVANKVKE<br>MVMMHQGLEFVEVNPFTSHQDPFVHKNPENTFRARYSRCTPSELTEKNRKEIL<br>SFLSDKPSKRPTNAYYNEGAMAFLATYGLKKNVDVLGVSLEKFKQIMANILHQRS<br>EDQLLFPSRGGMFYLATYKLDADATSVNWNGKQFWVCNADLVAAYNVGLVDI<br>QKDFKKK |
|--|--|--------------------------------------------------------------------------------------------------------------------------------------------------------------------------------------------------------------------------------------------------------------------------------------------------------------------------------------------------------------------------------------------------------------------------|

**Table 2:** List of Cas12a orthologs and their isoelectric points (Red = high pI, Blue = low pI)

| <b>Sr. No.</b> | <b>Name</b> | <b>Isoelectric Point</b> |
|----------------|-------------|--------------------------|
| 1              | CmtCas12a   | 8.72                     |
| 2              | Mb2Cas12a   | 8.66                     |
| 3              | PdCas12a    | 8.58                     |
| 4              | FnCas12a    | 8.57                     |
| 5              | MbCas12a    | 8.47                     |
| 6              | Mb3Cas12a   | 8.47                     |
| 7              | LbCas12a    | 8.38                     |
| 8              | HkCas12a    | 8.36                     |
| 9              | Pb2Cas12a   | 8.28                     |
| 10             | PcCas12a    | 8.2                      |
| 11             | BoCas12a    | 8.18                     |
| 12             | AsCas12a    | 8.01                     |
| 13             | BfCas12     | 7.76                     |
| 14             | ArCas12a    | 7.72                     |
| 15             | MICas12a    | 7.65                     |
| 16             | TsCas12a    | 7.15                     |
| 17             | Lb5Cas12a   | 7.04                     |
| 18             | ErCas12a    | 6.71                     |
| 19             | BsCas12a    | 6.47                     |
| 20             | LpCas12a    | 6.38                     |
| 21             | CmaCas12a   | 6.09                     |
| 22             | PxCas12a    | 5.66                     |
| 23             | PrCas12a    | 5.57                     |

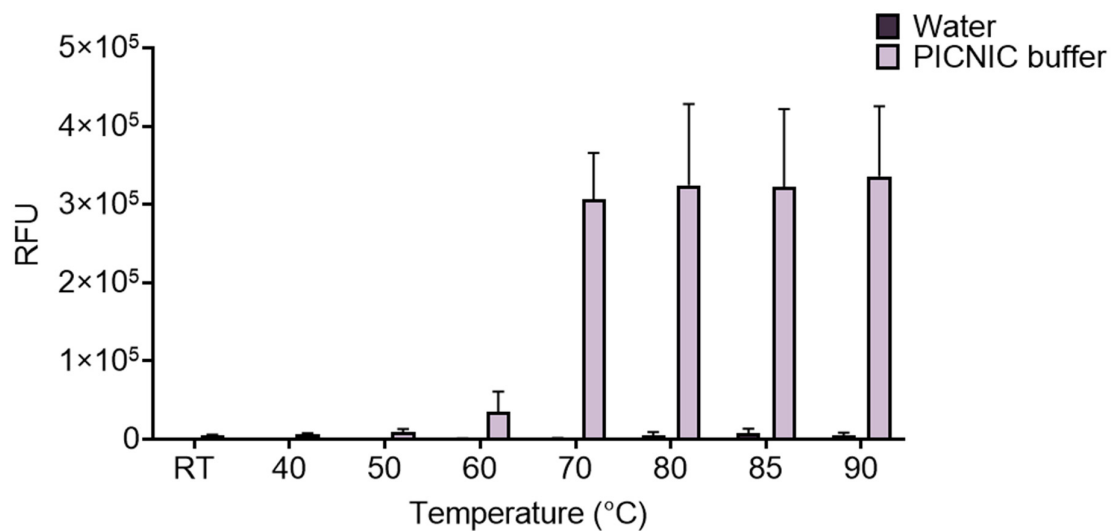

**Fig. S1:** Temperature dependency of denaturation of dsDNA substrates. Data showing the temperature dependence of trans-cleavage-mediated fluorescence activity in RFU with and without the addition of PICNIC buffer (pH=12) and temperatures ranging from room temperature (RT) to 90°C. Error bars represent Mean  $\pm$  S.D. (n=3).

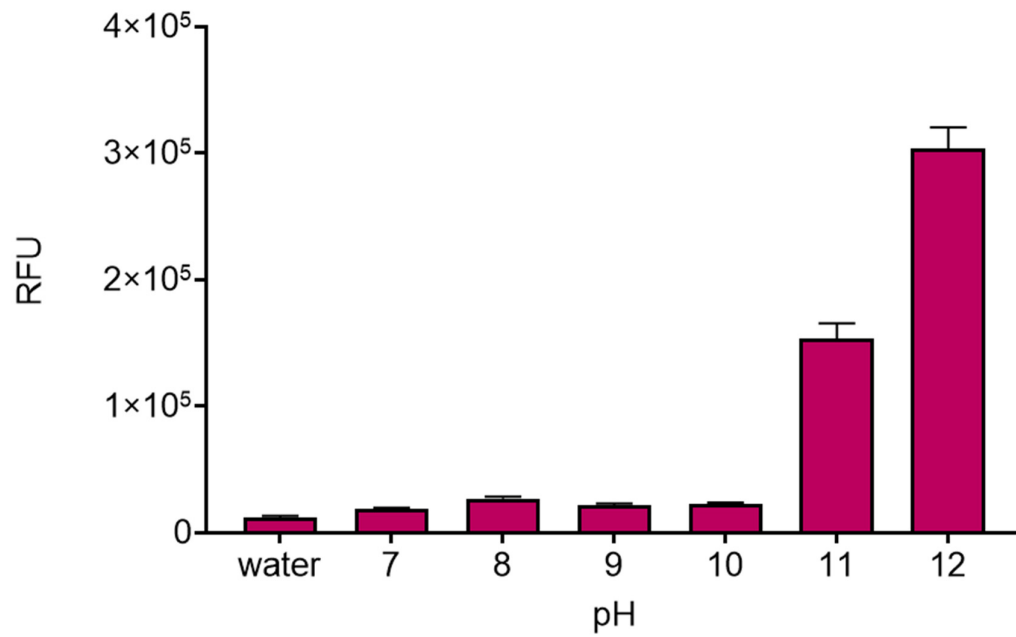

**Fig. S2:** The effect of pH on the DNA denaturation dynamics. Data showing trans cleavage dependence on pH for a PICNIC reaction. The pH ranges from neutral (7) to 12, with water used as a control. Plot represents the fluorescence intensity in RFU at each condition. Error bars represent Mean  $\pm$  S.D. (n=3).

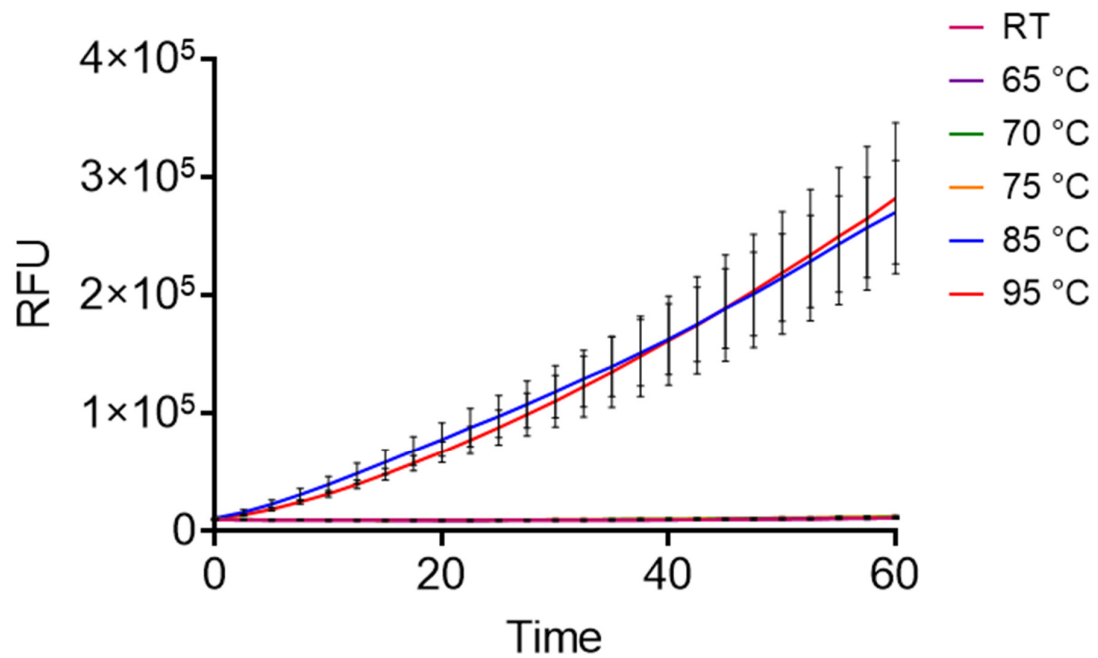

**Fig. S3:** The effect of incubation temperature on PICNIC method. Graph depicting trans-cleavage fluorescence values utilizing the PICNIC method at various temperatures, ranging from room temperature (RT) to 95°C. Error bars represent Mean  $\pm$  SD (n=3) is indicated.



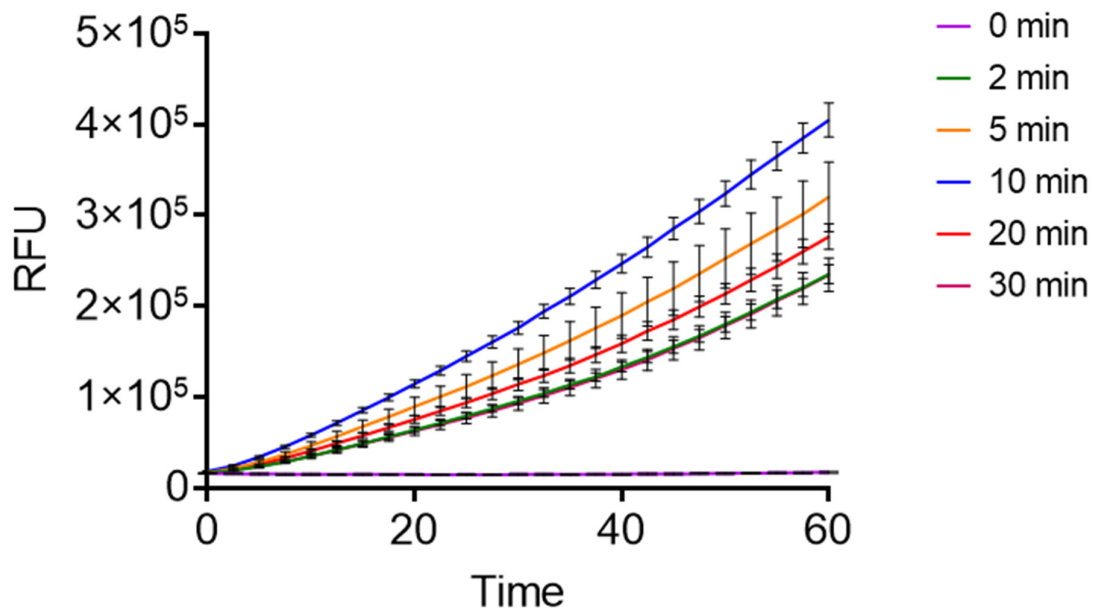

**Fig. S4:** The effect of heating time on PICNIC method. Graph illustrating the time dependence of target dsDNA denaturation via incubation, from 0 min to 30 min. All samples are incubated in PICNIC buffer at a pH of 12 and a temperature of 100°C and cooled for 15 minutes at room temperature. Error bars represent Mean  $\pm$  SD (n = 3).

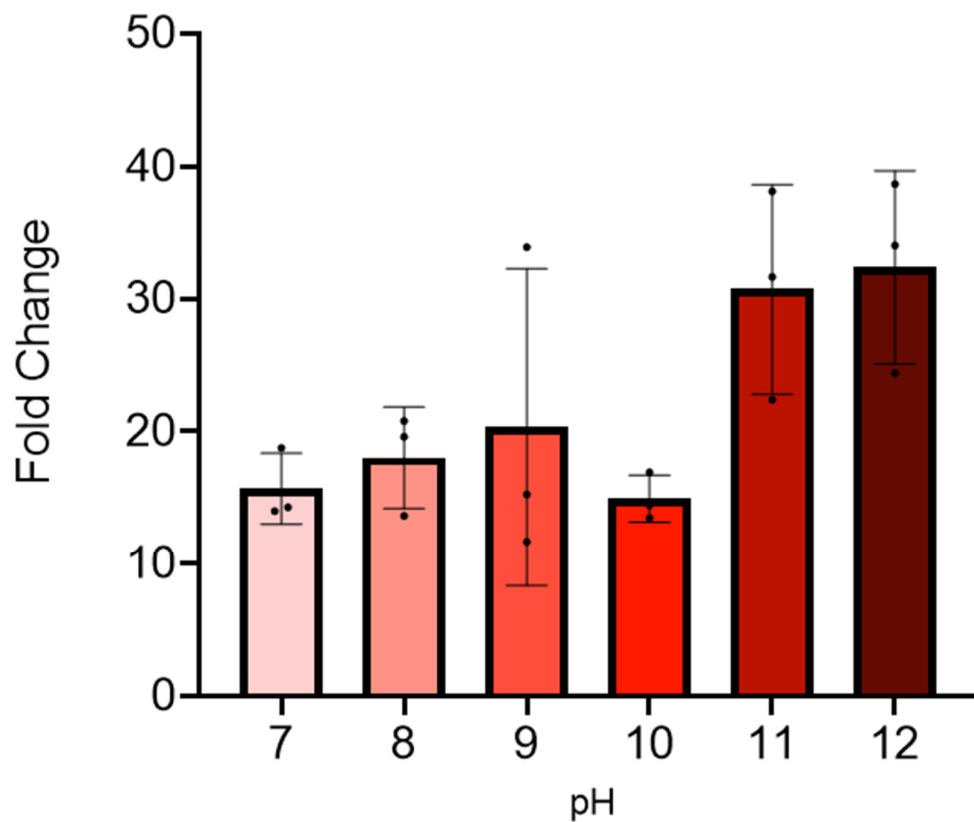

**Fig. S5:** pH dependence of trans-cleavage activity using the PICNIC method. All samples are incubated under the same conditions at 100°C for 10 minutes with differing pH. pH levels left to right are 7, 8, 9, 10, 11, and 12. Mean  $\pm$  SD (n = 3) is indicated.

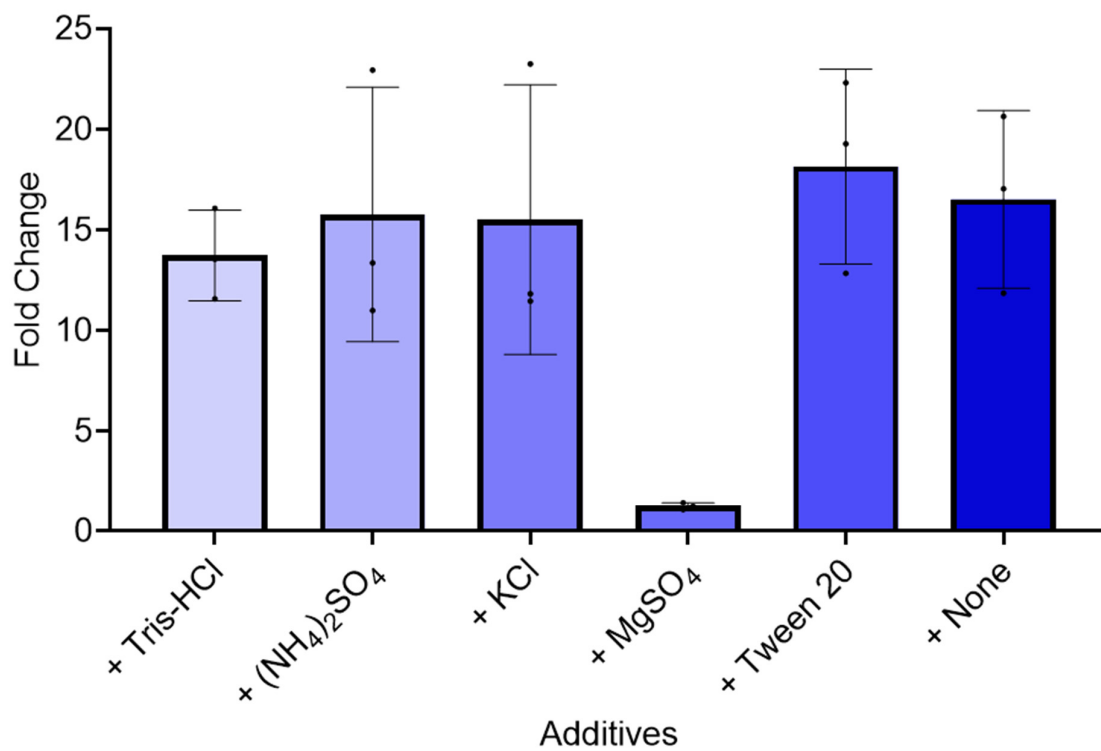

**Fig. S6:** Fold change at t=30 minutes utilizing the PICNIC method using water at a pH of 12. Various additives to this water at a pH of 12 are indicated. Mean  $\pm$  SD (n = 3) is indicated.

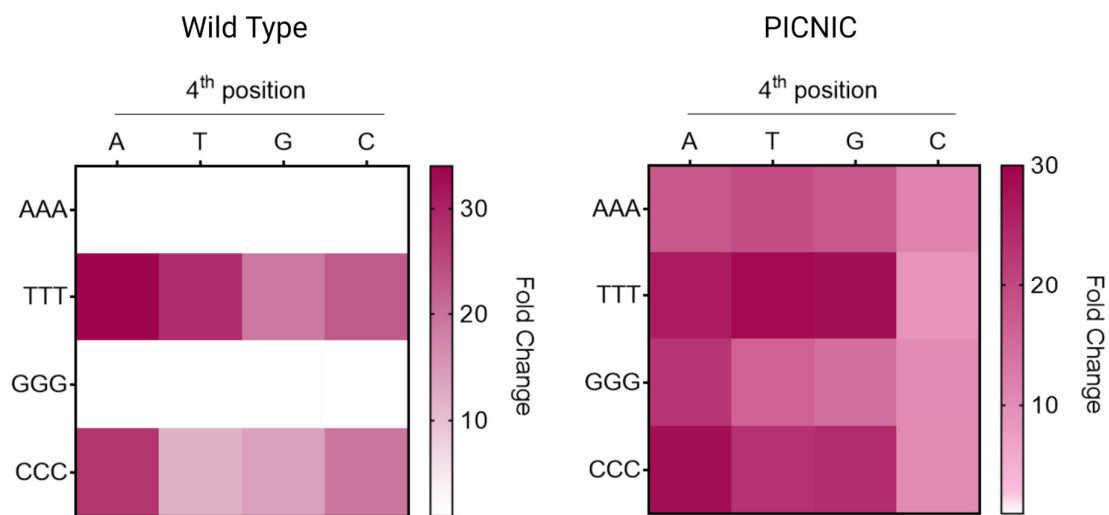

**Fig. S7:** The effect of changing the 4<sup>th</sup> nucleotide in the PAM sequence with WT-CRISPR and PICNIC method. Figure showing trans-cleavage activity of target sequences preceded by various PAM sequences under both Wild Type and PICNIC conditions. In this figure the fourth nucleotide of the 4-nucleotide PAM sequence is varied.

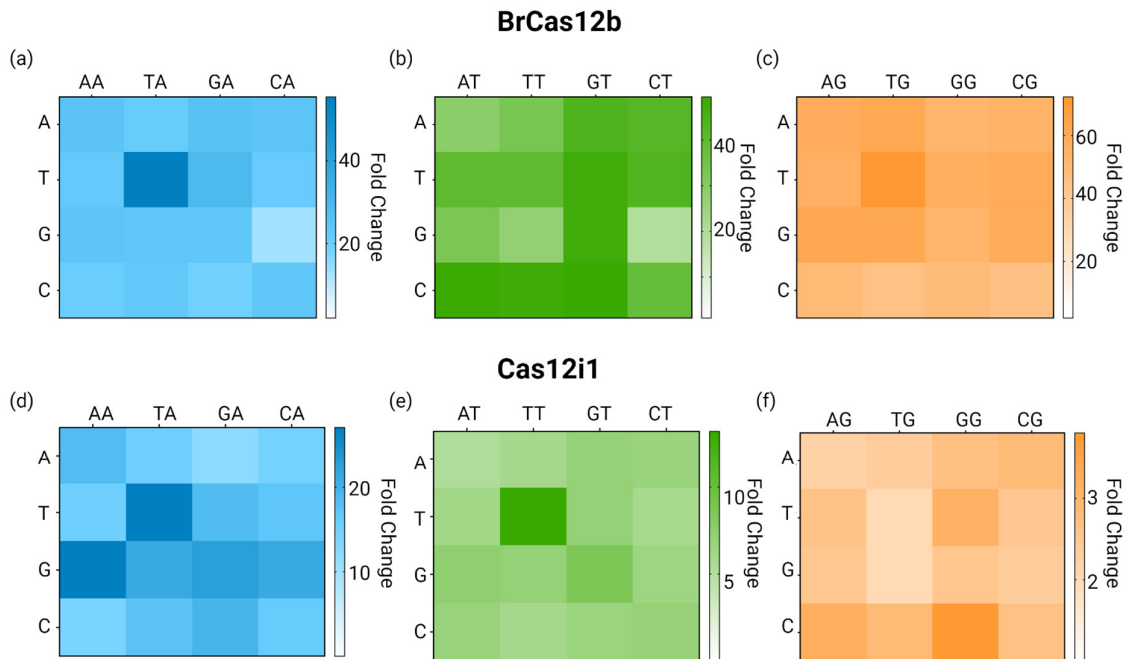

**Fig. S8:** PAM-library trans-cleavage with Cas12b and Cas12i. Figure showing trans-cleavage activity of target sequences preceded by various ‘NNN’ PAM sequences with PICNIC conditions using BrCas12b (top) and Cas12i1 (bottom).

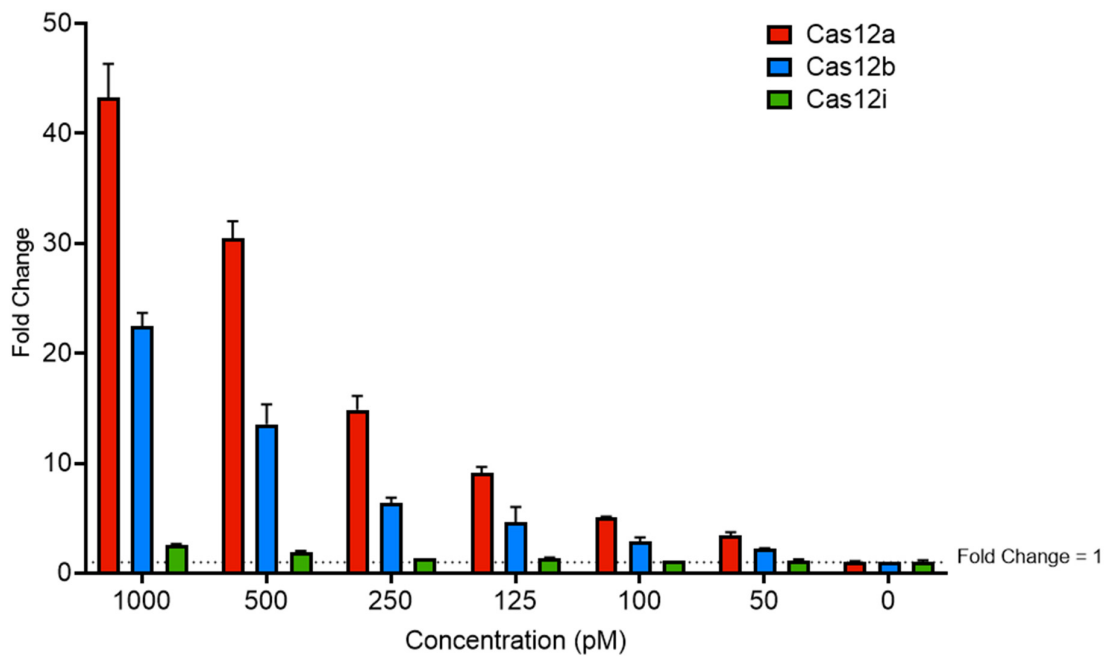

**Fig. S9:** Comparison of trans-cleavage activities of LbCas12a, BrCas12b, and Cas12i1. Figure showing the trans-cleavage activity of Cas12a, Cas12b, and Cas12i with target concentration varying from 1,000 to 0 pM. Here Cas12a is labeled red, Cas12b is labeled blue, and Cas12i is labeled green. Error bars represent Mean  $\pm$  SD (n=3).

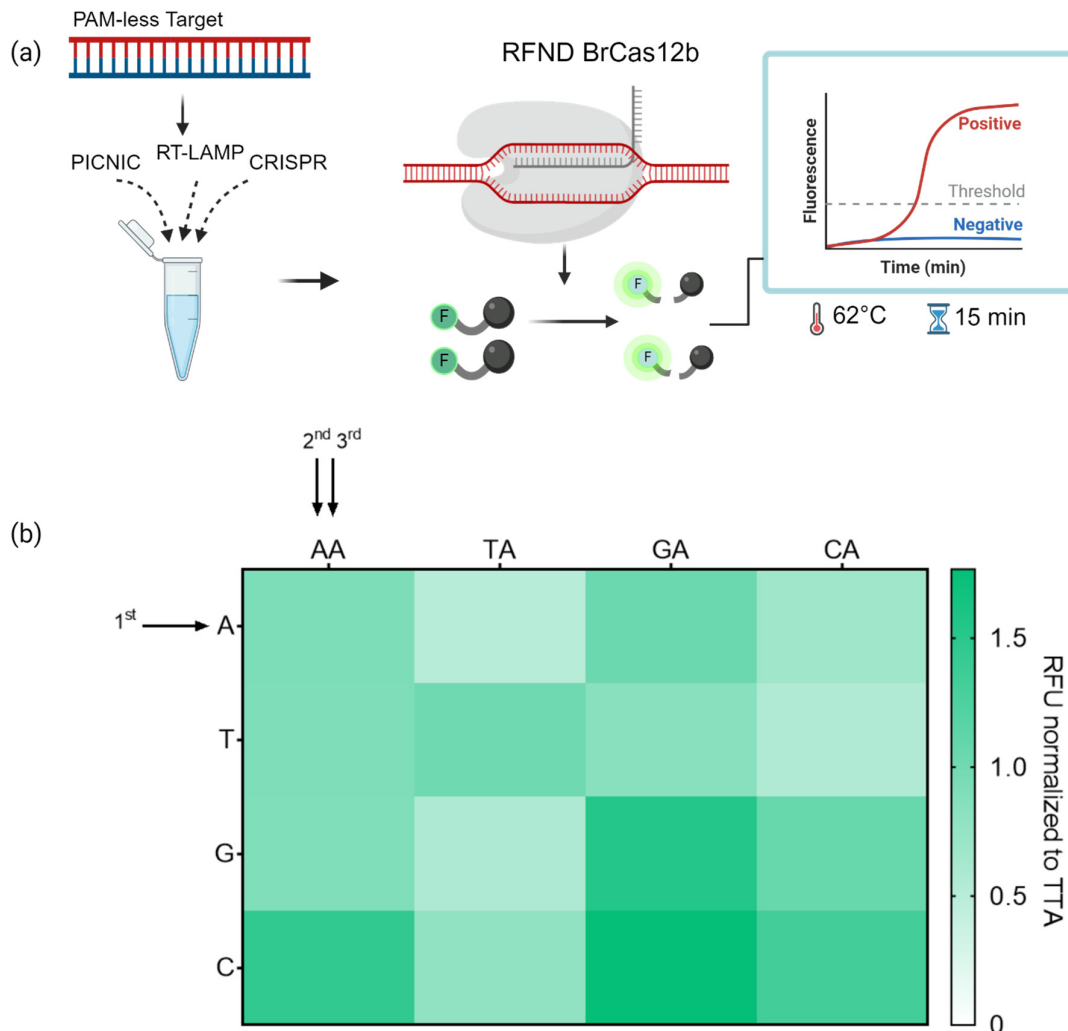

**Fig. S10:** Heat map represents the fold change of trans-cleavage of 15-nt truncated crRNAs containing A, U, G, or C bases at the first position, tested for the detection of targets containing T, A, C, or G base in a combinatorial fashion (n=3). The fold change is normalized to the activity of the canonical crRNA-target combination.

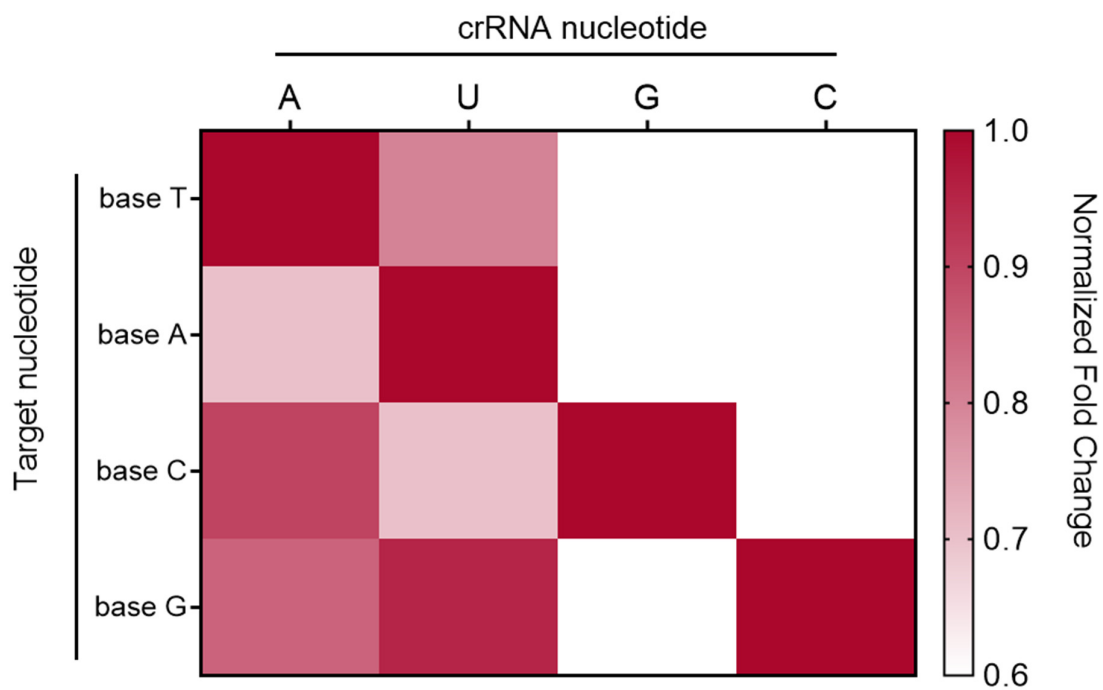

**Fig. S11:** Heat map represents the fold change of trans-cleavage of 15-nt truncated crRNAs containing A, U, G, or C bases at the first position, tested for the detection of targets containing T, A, C, or G base in a combinatorial fashion (n=3). The fold change is normalized to the activity of the canonical crRNA-target combination.



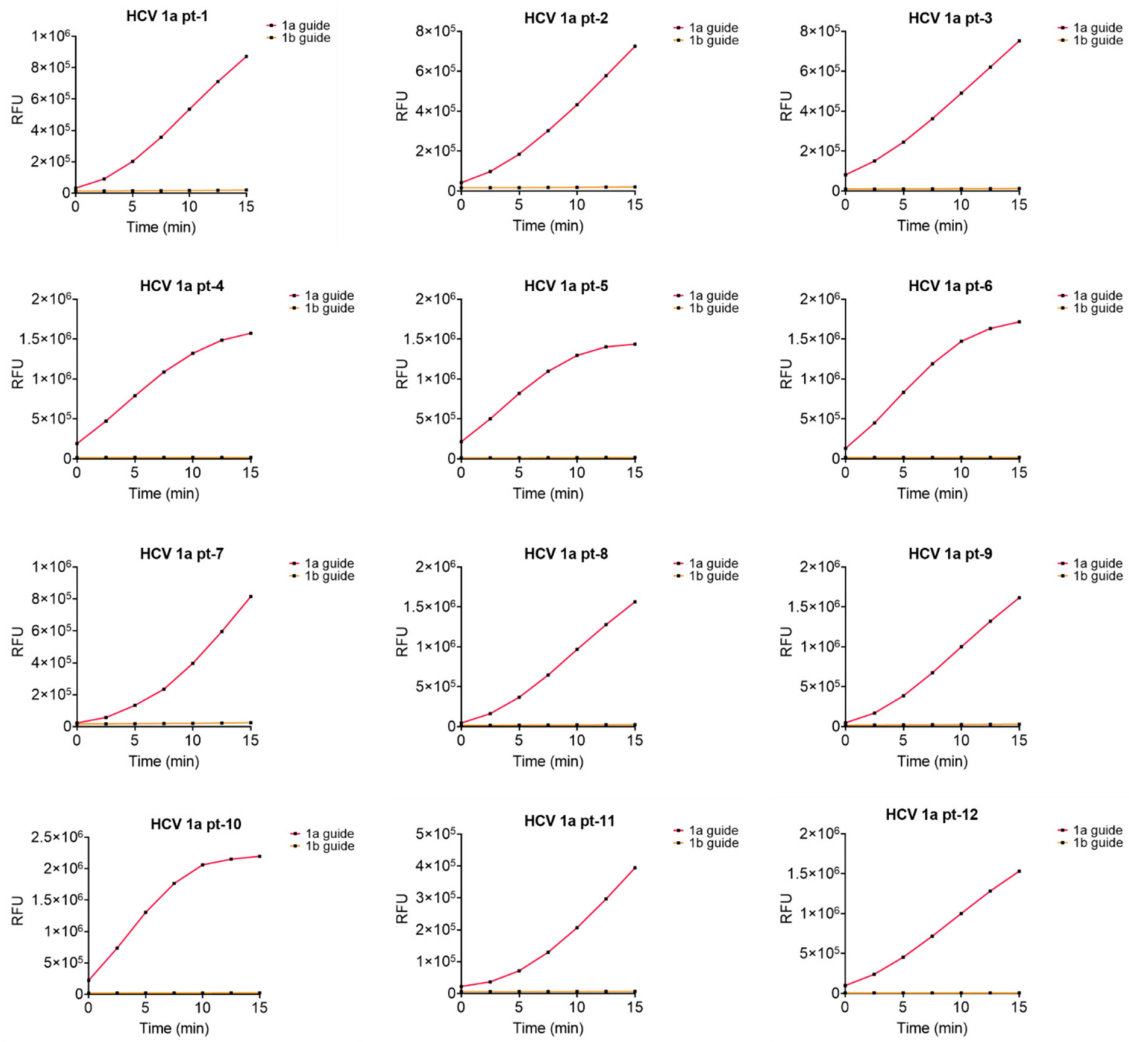

**Fig. S12:** Plot representing the intensity of the fluorescence obtained in RFU for the detection of 48 HCV-1a patient samples with a PICNIC-based test designed to genotype using specific crRNAs named HCV-1a guide RNA (red) and HCV-1b guide RNA (orange). The HCV-1a samples only show strong fluorescence in the presence of HCV-1a guide but not the HCV-1b guide.

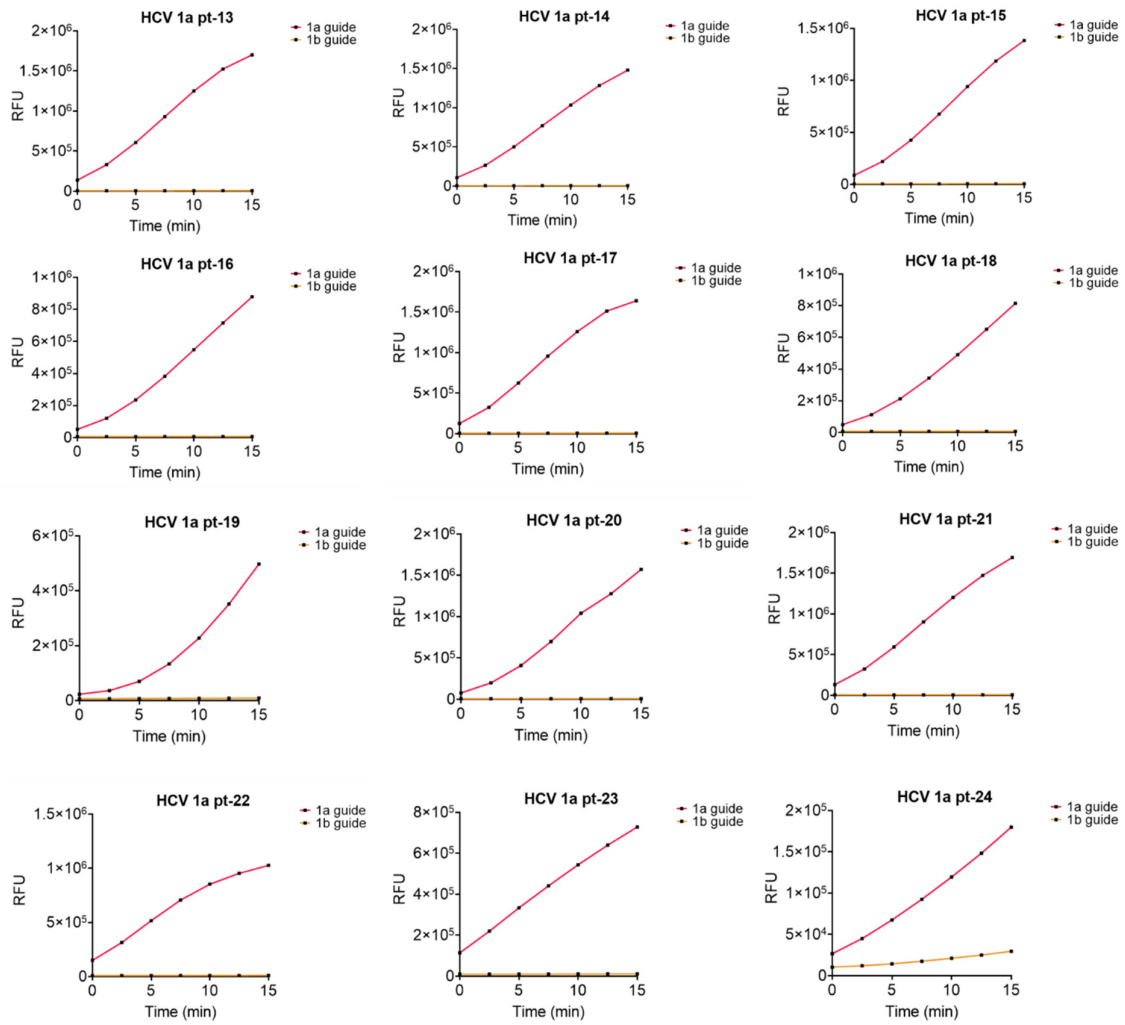

**Fig. S12 continued**

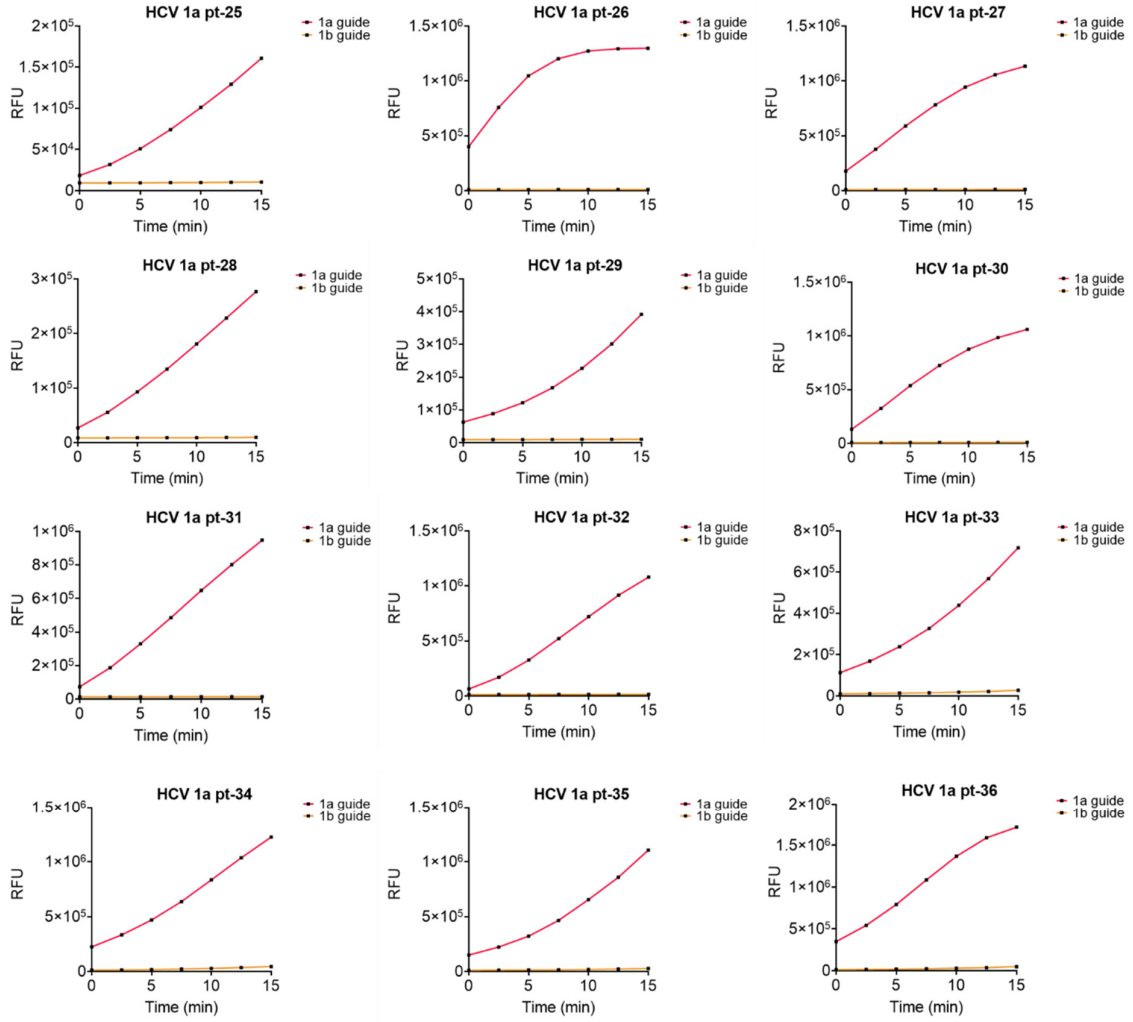

**Fig. S12 continued**

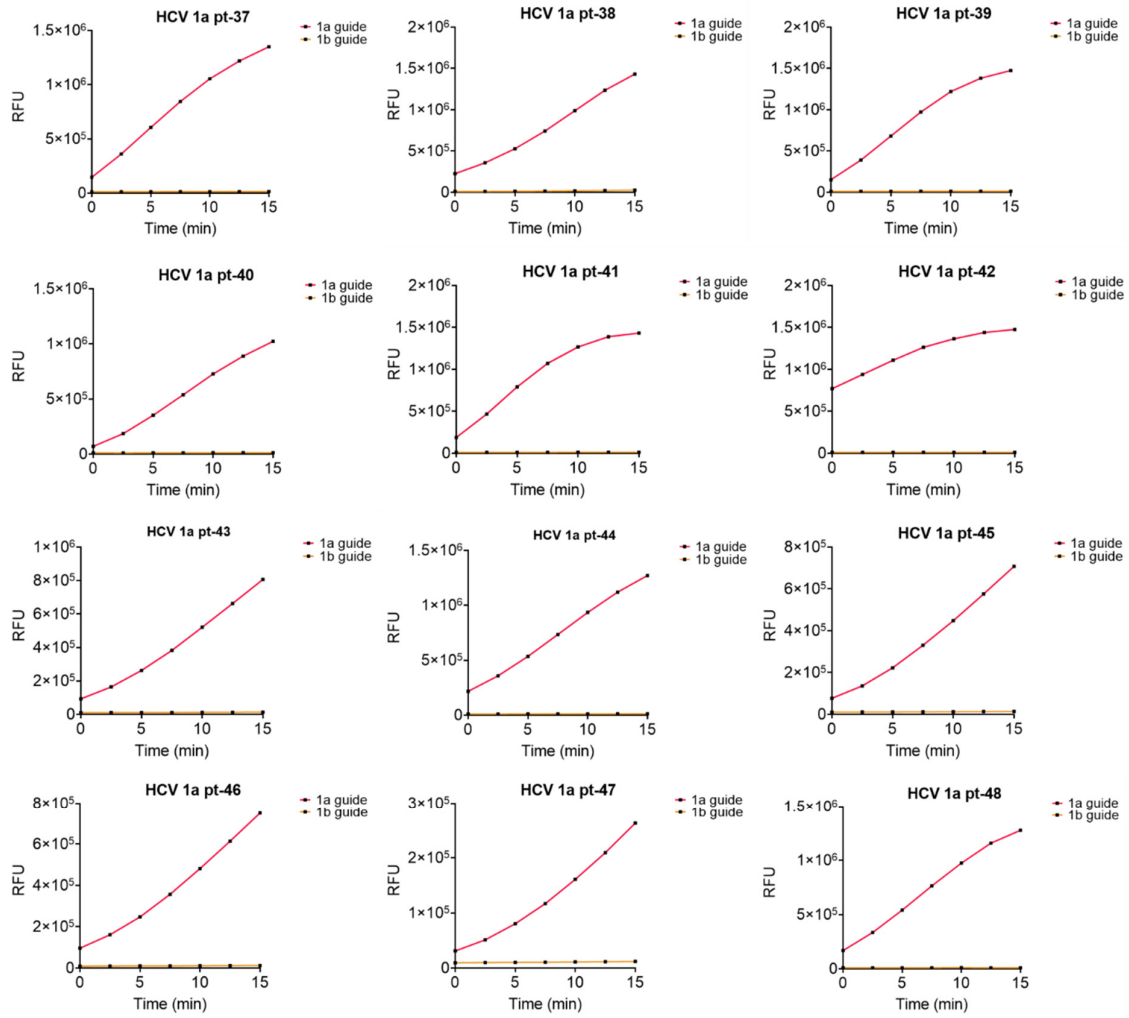

**Fig. S12 continued**

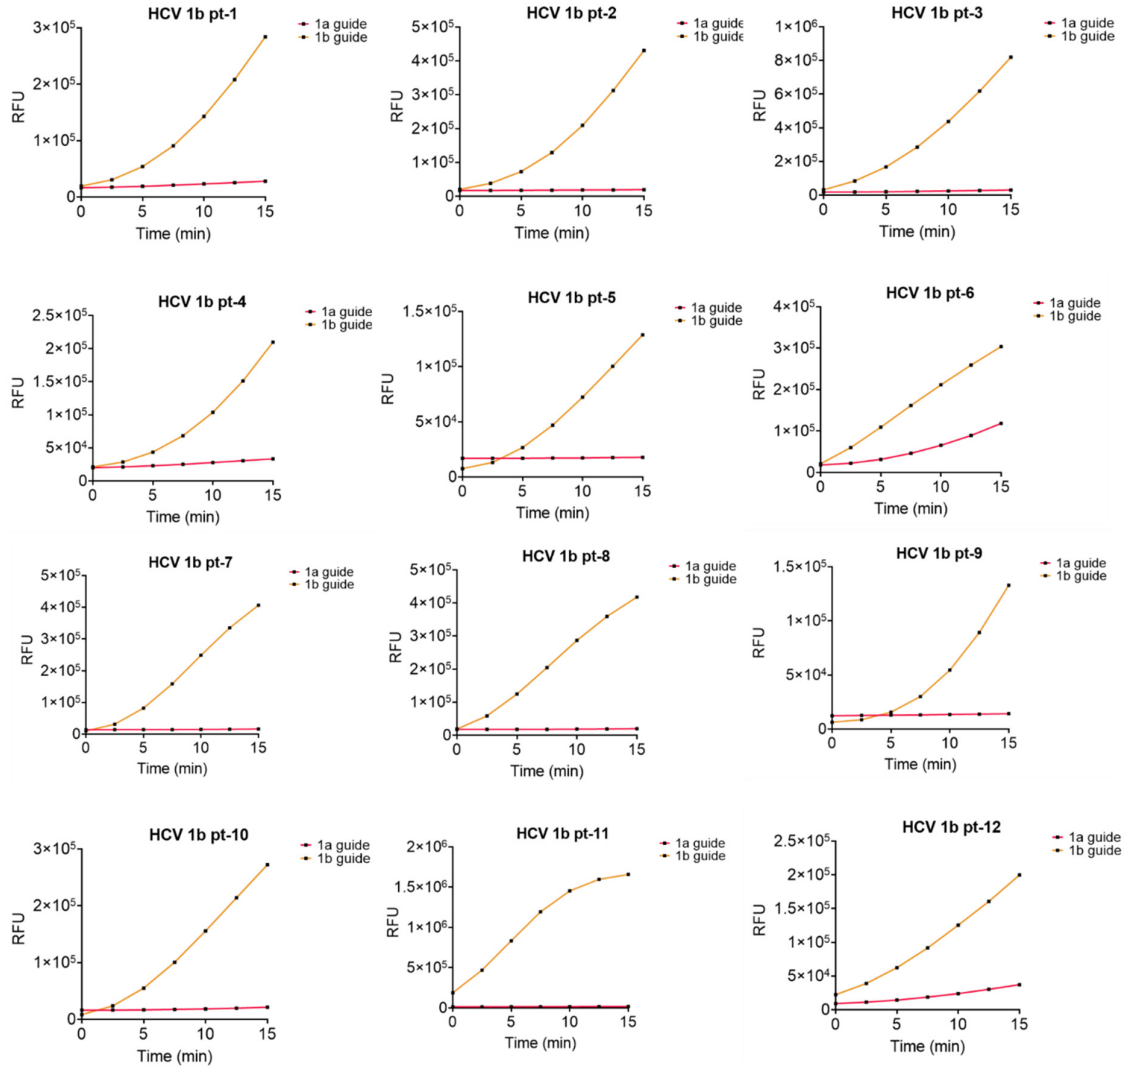

**Fig. S13:** Plot representing the intensity of the fluorescence obtained in RFU for the detection of 40 HCV-1b patient samples with a PICNIC-based test designed to genotype using specific crRNAs named HCV-1a guide RNA (red) and HCV-1b guide RNA (orange). The HCV-1b samples only show strong fluorescence in the presence of HCV-1b guide but not the HCV-1a guide.

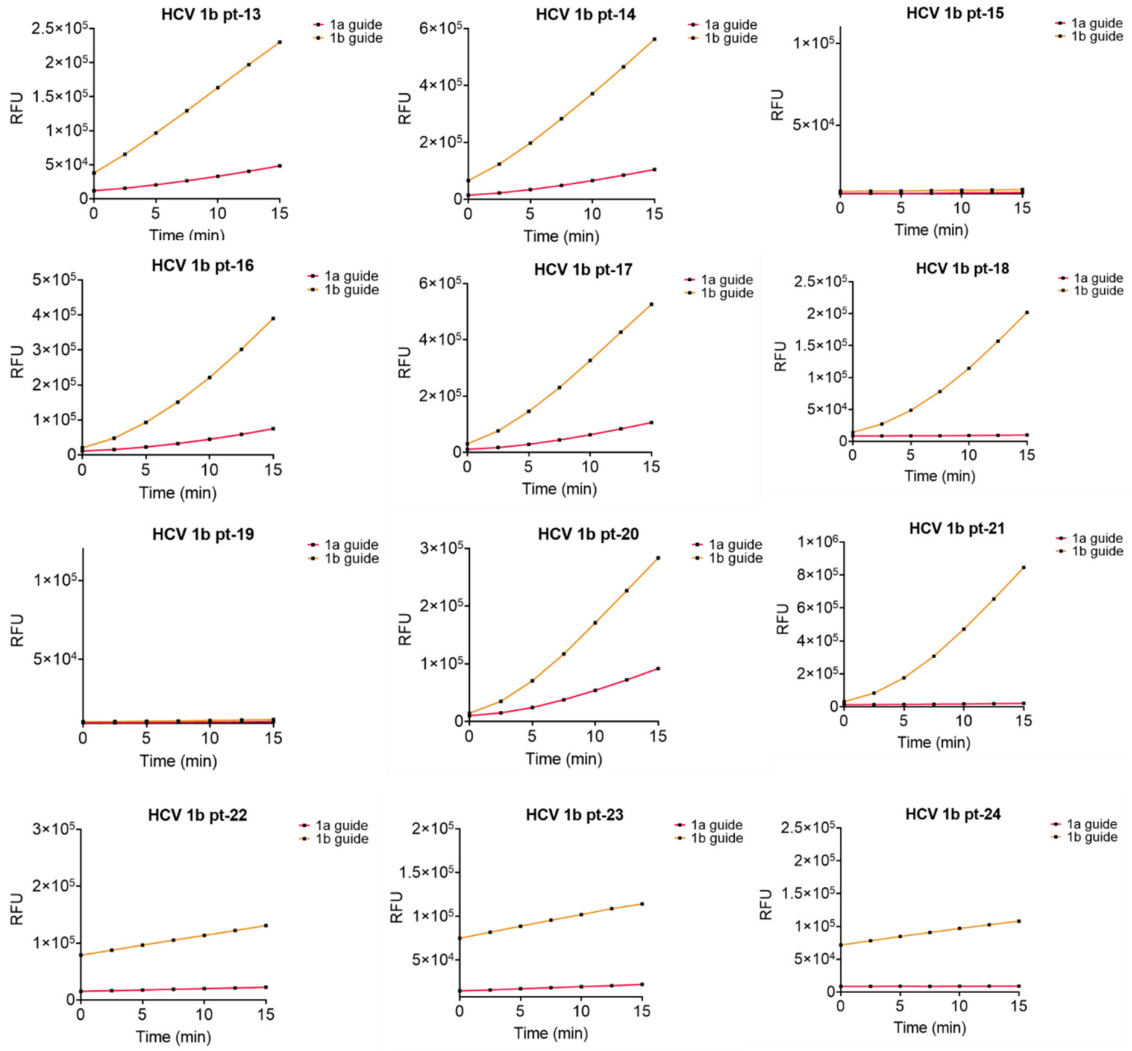

**Fig. S13 continued**

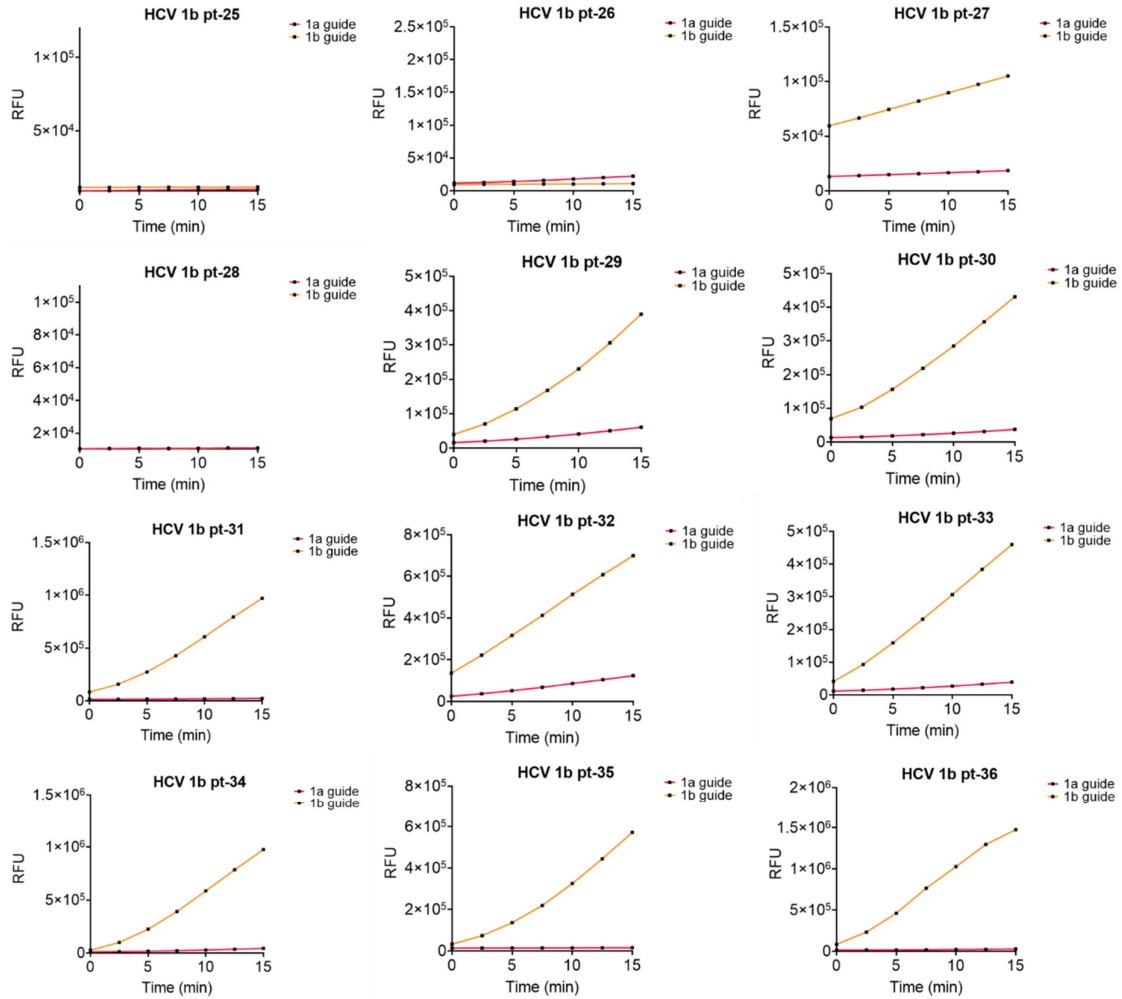

**Fig. S13 continued**

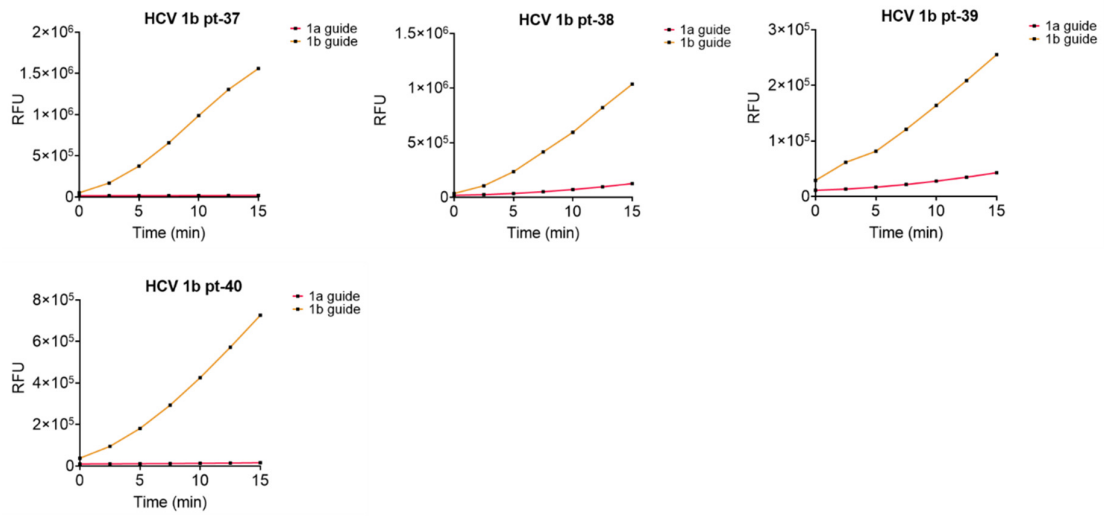

**Fig. S13 continued**
